# Supplementary material for: Effect of Targeted Behavioral Science Messages on COVID-19 Vaccination Registration Among Employees of a Large Health System: A Randomized Trial
Source: PubMed Central journal article supplement (PMC8319759; doi:10.1001/jamanetworkopen.2021.18702), 2021-07-28
Supplement: jamanetwopen-e2118702-s003.pdf [file jamanetwopen-e2118702-s003.pdf]

## Data Sharing Statement

Santos. Effect of Targeted Behavioral Science Messages on COVID-19 Vaccination Registration Among Employees of a Large Health System. *JAMA Netw Open*. Published July 28, 2021.  
doi:10.1001/jamanetworkopen.2021.18702

### Data

**Data available:** Yes

**Data types:** Deidentified participant data, Data dictionary

**How to access data:** OSF, <https://osf.io/qg5m6/>

**When available:** With publication

### Supporting Documents

**Document types:** Statistical/analytic code, Other (please specify)

**Additional Information:** Materials

**How to access documents:** OSF, <https://osf.io/qg5m6/>

**When available:** With publication

### Additional Information

**Who can access the data:** Anyone requesting the data

**Types of analyses:** Any purpose

**Mechanisms of data availability:** Open access de-identified data, code, and materials-no fees, no permissions necessary.

**Any additional restrictions:** None
